# Supplementary material for: Genomic Diversity within the Enterobacter cloacae Complex
Source: PLoS One. 2008 Aug 21;3(8):e3018. doi: 10.1371/journal.pone.0003018 (PMC2515634; doi:10.1371/journal.pone.0003018)
Supplement: Table S1 — Isolates used in this study (0.05 MB XLS) [file pone.0003018.s001.xls]

## Sheet: Table S1
Table S1. Isolates used in the study.
Isolate no.	No. rep.a	Country	Hospital	clusterb	rpoB-genotyping	hsp60-genotyping	MLSA-typed	same patiënt	PFGE-type	outbreak no.	Detection of specific genes by PCRc
											qnr	bla CXT-M-9	irp1
4		NL	1	1	E. hormaechei	E. cloacae III			31		0	0	0
8		NL	1	1	E. hormaechei	E. cloacae III			5		1	1	0
19	3	NL	1	1	E. hormaechei	E. cloacae III	1		15		0	0	0
22		NL	1	1	E. hormaechei	E. cloacae III	1		-		0	0	0
23		NL	1	1	E. hormaechei	E. cloacae III		a	33		1	1	0
29		NL	1	1	E. hormaechei	E. cloacae III	1		37		1	1	0
30		NL	1	1	E. hormaechei	E. cloacae III			38		0	0	0
47		NL	1	1	E. hormaechei	E. cloacae III			34		0	0	0
52		NL	1	1	E. hormaechei	E. cloacae III			29		0	0	1
54		NL	1	1	E. hormaechei	E. cloacae III			30		0	0	0
56		NL	1	1	E. hormaechei	E. cloacae III			47		0	0	0
61		NL	1	1	E. hormaechei	E. cloacae III			15		0	0	0
84		NL	1	1	E. hormaechei	E. cloacae III			20		0	0	0
88		NL	1	1	E. hormaechei	E. cloacae III			4		0	0	0
94		NL	1	1	E. hormaechei	E. cloacae III			39		0	0	0
99	2	NL	1	1	E. hormaechei	E. cloacae III			31		0	0	0
102		NL	1	1	E. hormaechei	E. cloacae III			32		1	0	0
116		ESP	6	1	E. hormaechei	E. cloacae III			14		0	0	0
117		POR	7	1	E. hormaechei	E. cloacae III	1		26		0	0	0
122		NL	8	1	E. hormaechei	E. cloacae III			38		0	0	0
123		NL	8	1	E. hormaechei	E. cloacae III			38		0	0	0
130		NL	8	1	E. hormaechei	E. cloacae III	1		-		0	0	0
142		AUS	16	1	E. hormaechei	E. cloacae III			17		0	0	0
143		GBR	17	1	E. hormaechei	E. cloacae III			50		0	0	0
145		FRA	19	1	E. hormaechei	E. cloacae III			28		0	0	0
1		NL	1	2	E. hormaechei	E. hormaechei steigerwaltii	1		8		0	0	0
2		NL	1	2	E. hormaechei	E. hormaechei steigerwaltii	1		20		0	0	0
3		NL	1	2	E. hormaechei	E. hormaechei steigerwaltii			16		0	0	0
9		NL	1	2	E. hormaechei	E. hormaechei oharae	1		14		0	0	0
10		NL	1	2	E. hormaechei	E. hormaechei steigerwaltii			49		0	0	0
11		NL	1	2	E. hormaechei	E. hormaechei steigerwaltii	1		32		0	0	0
13	2	NL	1	2	E. hormaechei	E. hormaechei steigerwaltii	1		11		0	1	0
14		NL	1	2	E. hormaechei	E. hormaechei steigerwaltii			8	II	0	0	0
17	2	NL	1	2	E. hormaechei	E. hormaechei steigerwaltii			7		0	0	0
18		NL	1	2	E. hormaechei	E. hormaechei steigerwaltii			9		0	0	0
20		NL	1	2	E. hormaechei	E. hormaechei oharae	1		5		0	0	0
21		NL	1	2	E. hormaechei	E. hormaechei oharae			36		0	0	0
24		NL	1	2	E. hormaechei	E. hormaechei steigerwaltii	1	a	37		1	0	0
25		NL	1	2	E. hormaechei	E. hormaechei steigerwaltii	1		43		0	0	0
33	2	NL	1	2	E. hormaechei	E. hormaechei steigerwaltii			9		0	0	0
34		NL	1	2	E. hormaechei	E. hormaechei steigerwaltii	1		2		0	0	0
35		NL	1	2	E. hormaechei	E. hormaechei steigerwaltii			11		0	0	0
36		NL	1	2	E. hormaechei	E. hormaechei oharae	1		45		0	0	0
41	2	NL	1	2	E. hormaechei	E. hormaechei oharae	1		8	II	0	0	0
46		NL	1	2	E. hormaechei	E. hormaechei steigerwaltii			13		0	0	0
48	2	NL	1	2	E. hormaechei	E. hormaechei oharae	1	d	14		0	0	0
49		NL	1	2	E. hormaechei	E. hormaechei oharae		d	14		1	0	0
50		NL	1	2	E. hormaechei	E. hormaechei steigerwaltii			10		0	0	0
57		NL	1	2	E. hormaechei	E. hormaechei steigerwaltii			41		0	0	0
59	2	NL	1	2	E. hormaechei	E. hormaechei oharae			36		0	0	0
60		NL	1	2	E. hormaechei	E. hormaechei oharae	1		50		0	0	0
63		NL	1	2	E. hormaechei	E. hormaechei oharae			3		0	0	0
64		NL	1	2	E. hormaechei	E. hormaechei steigerwaltii			46		0	0	0
65		NL	1	2	E. hormaechei	E. hormaechei steigerwaltii			42		0	0	0
66		NL	1	2	E. hormaechei	E. hormaechei steigerwaltii	1		8	II	0	0	0
71		NL	1	2	E. hormaechei	E. hormaechei steigerwaltii			25		0	0	0
72		NL	1	2	E. hormaechei	E. hormaechei steigerwaltii	1		2		1	1	1
73		NL	1	2	E. hormaechei	E. hormaechei oharae	1		31		0	0	0
75		NL	1	2	E. hormaechei	E. hormaechei steigerwaltii			44		0	0	0
90		NL	1	2	E. hormaechei	E. hormaechei steigerwaltii			17		0	0	0
93	2	NL	1	2	E. hormaechei	E. hormaechei steigerwaltii	1		10		0	0	0
97		NL	1	2	E. hormaechei	E. hormaechei steigerwaltii			13		0	0	0
103		NL	1	2	E. hormaechei	E. hormaechei steigerwaltii	1		58		0	0	0
107		NL	1	2	E. hormaechei	E. hormaechei steigerwaltii			57		0	0	0
112		NL	4	2	E. hormaechei	E. hormaechei steigerwaltii			13	V	1	1	0
113		NL	4	2	E. hormaechei	E. hormaechei steigerwaltii	1		13	V	0	1	0
114		NL	4	2	E. hormaechei	E. hormaechei steigerwaltii			13	V	1	1	0
124		NL	8	2	E. hormaechei	E. hormaechei steigerwaltii	1		12		0	0	0
126	2	NL	8	2	E. hormaechei	E. hormaechei steigerwaltii		h	13		0	0	0
127		NL	8	2	E. hormaechei	E. hormaechei steigerwaltii		h	13		0	0	0
137		NL	12	2	E. hormaechei	E. hormaechei steigerwaltii			1		1	0	0
139		NL	13	2	E. hormaechei	E. hormaechei steigerwaltii			11		0	0	0
141		FRA	15	2	E. hormaechei	E. hormaechei steigerwaltii			21		0	0	0
144		ESP	18	2	E. hormaechei	E. hormaechei steigerwaltii			17		0	0	0
146		ITA	20	2	E. hormaechei	E. hormaechei oharae	1		27		0	0	0
148		ESP	22	2	E. hormaechei	E. hormaechei oharae	1		5		0	0	0
152		NL	24	2	E. hormaechei	E. hormaechei steigerwaltii	1		1		0	0	0
153		POL	25	2	E. hormaechei	E. hormaechei steigerwaltii	1		56		0	0	0
155		NL	26	2	E. hormaechei	E. hormaechei steigerwaltii			11	III	0	0	0
156		NL	26	2	E. hormaechei	E. hormaechei steigerwaltii			11	III	0	0	0
5		NL	1	2	E. hormaechei	E. hormaechei steigerwaltii			1	I	1	1	1
7		NL	1	2	E. hormaechei	E. hormaechei steigerwaltii			1	I	0	0	1
16		NL	1	2	E. hormaechei	E. hormaechei steigerwaltii			1	I	0	1	1
27		NL	1	2	E. hormaechei	E. hormaechei steigerwaltii			1	I	0	0	0
31	4	NL	1	2	E. hormaechei	E. hormaechei steigerwaltii			1	I	1	1	1
37		NL	1	2	E. hormaechei	E. hormaechei steigerwaltii		b	1	I	1	1	1
38		NL	1	2	E. hormaechei	E. hormaechei steigerwaltii		b	1	I	0	0	0
44		NL	1	2	E. hormaechei	E. hormaechei steigerwaltii		c	1	I	1	1	1
45		NL	1	2	E. hormaechei	E. hormaechei steigerwaltii		c	1	I	0	0	1
53		NL	1	2	E. hormaechei	E. hormaechei steigerwaltii			3	I	0	0	0
55		NL	1	2	E. hormaechei	E. hormaechei steigerwaltii			1	I	1	1	1
58		NL	1	2	E. hormaechei	E. hormaechei steigerwaltii			1	I	1	1	1
67		NL	1	2	E. hormaechei	E. hormaechei steigerwaltii			1	I	0	1	1
69		NL	1	2	E. hormaechei	E. hormaechei steigerwaltii		e	1	I	1	1	1
70		NL	1	2	E. hormaechei	E. hormaechei steigerwaltii		e	1	I	0	0	1
74		NL	1	2	E. hormaechei	E. hormaechei steigerwaltii			1	I	1	1	1
77		NL	1	2	E. hormaechei	E. hormaechei steigerwaltii		f	1	I	1	1	1
78	3	NL	1	2	E. hormaechei	E. hormaechei steigerwaltii		f	1	I	0	0	1
79	2	NL	1	2	E. hormaechei	E. hormaechei steigerwaltii			1	I	1	1	1
86		NL	1	2	E. hormaechei	E. hormaechei steigerwaltii		g	1	I	1	1	0
87		NL	1	2	E. hormaechei	E. hormaechei steigerwaltii		g	1	I	0	0	1
89		NL	1	2	E. hormaechei	E. hormaechei steigerwaltii			1	I	1	1	1
92		NL	1	2	E. hormaechei	E. hormaechei steigerwaltii			1	I	0	1	1
95		NL	1	2	E. hormaechei	E. hormaechei steigerwaltii			1	I	1	1	0
96		NL	1	2	E. hormaechei	E. hormaechei steigerwaltii			1	I	1	1	1
98		NL	1	2	E. hormaechei	E. hormaechei steigerwaltii	1		1	I	1	1	1
100		NL	1	2	E. hormaechei	E. hormaechei steigerwaltii			1	I	1	1	1
106		NL	1	2	E. hormaechei	E. hormaechei steigerwaltii			1	I	1	1	1
108		NL	2	2	E. hormaechei	E. hormaechei steigerwaltii			1	I	1	1	1
109		NL	3	2	E. hormaechei	E. hormaechei steigerwaltii			1	I	1	1	1
115		NL	5	2	E. hormaechei	E. hormaechei steigerwaltii			1	I	1	1	1
131		NL	9	2	E. hormaechei	E. hormaechei steigerwaltii			1	I	1	1	1
136		NL	12	2	E. hormaechei	E. hormaechei steigerwaltii			1	I	1	1	1
138		NL	13	2	E. hormaechei	E. hormaechei steigerwaltii			1	I	1	1	1
147		NL	21	2	E. hormaechei	E. hormaechei steigerwaltii			1	I	1	1	1
154		NL	26	2	E. hormaechei	E. hormaechei steigerwaltii			1	I	1	1	1
12		NL	1	7	E. cloacae IV	E. cloacae IV			53	VIII	1	1	0
40		NL	1	7	E. cloacae IV	E. cloacae IV			12		1	1	0
42		NL	1	7	E. cloacae IV	E. cloacae IV	1		14		0	0	0
51		NL	1	7	E. cloacae IV	E. cloacae IV			53	VIII	1	1	0
101		NL	1	7	E. cloacae IV	E. cloacae IV	1		12		1	1	0
104	2	NL	1	7	E. cloacae IV	E. cloacae IV	1		53	VIII	1	1	0
110		NL	4	7	E. cloacae IV	E. cloacae IV			52	VII	1	1	0
111		NL	4	7	E. cloacae IV	E. cloacae IV			52	VII	1	1	0
118		NL	8	7	E. cloacae IV	E. cloacae IV	1		36		0	0	0
121		NL	8	7	E. cloacae IV	E. cloacae IV	1		48		0	0	0
132		NL	10	7	E. cloacae IV	E. cloacae IV			27	VI	0	0	0
133		NL	10	7	E. cloacae IV	E. cloacae IV			27	VI	0	0	0
134		NL	10	7	E. cloacae IV	E. cloacae IV			27	VI	0	0	0
6	2	NL	1	5	E. asburiae	E.asburiae			21		0	1	0
62		NL	1	5	E. asburiae	E.asburiae	1		6		0	0	0
119		NL	8	5	E. asburiae	E.asburiae	1		51		0	0	0
120		NL	8	5	E. asburiae	E.asburiae	1		40		0	0	0
135		ITA	11	5	E. asburiae	E.asburiae	1		16		0	0	0
140	2	ZWI	14	5	E. asburiae	E.asburiae			20		0	0	0
149		NL	23	5	E. asburiae	E.asburiae			12	IV	0	0	0
150		NL	23	5	E. asburiae	E.asburiae	1		12	IV	0	0	0
151		NL	23	5	E. asburiae	E.asburiae			12	IV	0	0	0
26		NL	1	6	E. cloacae IV	E. kobei			22		1	1	0
81		NL	1	6	E. cloacae IV	E. kobei			14		0	0	0
82		NL	1	6	E. cloacae IV	E. kobei			35		0	0	0
83		NL	1	6	E. cloacae IV	E. kobei			8		0	0	0
91		NL	1	6	E. cloacae IV	E. kobei			16		1	1	0
105		NL	1	6	E. cloacae IV	E. kobei	1		12		0	0	0
129		NL	8	6	E. cloacae IV	E. kobei	1		-		0	0	0
15	2	NL	1	4	E. ludwigii	E. ludwigii	1		24		0	0	0
28		NL	1	4	E. ludwigii	E. ludwigii			54		0	0	0
32		NL	1	3	E. cloacae	E. cloacae cloacae			23		0	0	0
39		NL	1	3	E.hormaecheid	E. cloacae IX d	1		24		0	0	0
43		NL	1	4	E. ludwigii	E. ludwigii			46		0	0	0
68		NL	1	-	E. asburiaed	E. cloacae III d	1		36		0	0	0
76		NL	1	4	E. ludwigii	E. ludwigii	1		19		0	0	0
80		NL	1	3	E. cloacae	E. cloacae cloacae	1		59		0	0	0
85		NL	1	3	E. cloacaed	E. cloacae dissolvensd	1		18		0	0	0
125	2	NL	8	4	E. ludwigii	E. ludwigii	1		55		0	0	0
128		NL	8	4	E. ludwigii	E. ludwigii			-		0	0	0
157		Type	-	3	E. cloacae	E. cloacae cloacae	1	I	60		0	0	0
158		Type+	-	3	E. cloacae	E. cloacae cloacae		I	-		1	1	0
aNumber of replicates tested. bCluster according to MLSA and comparative genome hybridization results. cqnr (detection of the quinolone resistance gene [30]), blaCTX-M-9 (detection of the CXT-M-9 ß-lactamase encoding gene [30]) and irp1(detection of irp1 gene, which is a marker for the High Patohgenicity Island encoding an iron uptake system [44]), (1) gene is present, (0) is gene is absent accor…
